# Supplementary material
Source: publisher figshare collection journal article supplement (https://karger.figshare.com/ndownloader/files/14413652)
Supplement: Supplementary file 1 [file 14413652]

| **Supplement Table 1. Number of published articles per time period and per journal** | | | | |
| --- | --- | --- | --- | --- |
| **Journal** | **2000–2005** | **2006–2010** | **>2010** | **Totals** |
| Journal of Neurosurgery Publishing Group (JNSPG) | 3 | 6 | 47 | 56 |
| *JNS* | 0 | 0 | 0 | 0 |
| *JNS-Pediatrics* [[20-22](#_ENREF_20), [27](#_ENREF_27), [28](#_ENREF_28), [30](#_ENREF_30), [33](#_ENREF_33), [35-37](#_ENREF_35), [39-44](#_ENREF_39), [53](#_ENREF_53), [55](#_ENREF_55), [57](#_ENREF_57), [59](#_ENREF_59), [62](#_ENREF_62), [64](#_ENREF_64), [66](#_ENREF_66), [67](#_ENREF_67), [69-71](#_ENREF_69), [73](#_ENREF_73), [74](#_ENREF_74), [77](#_ENREF_77), [82-86](#_ENREF_82), [88](#_ENREF_88), [90](#_ENREF_90), [94](#_ENREF_94), [95](#_ENREF_95), [98-105](#_ENREF_98)] | 3 | 6 | 38 | 47 |
| *JNS-Spine* [[45](#_ENREF_45), [56](#_ENREF_56)] | 0 | 0 | 2 | 2 |
| *JNS-Focus* [[23](#_ENREF_23), [58](#_ENREF_58), [60](#_ENREF_60), [61](#_ENREF_61), [75](#_ENREF_75), [76](#_ENREF_76), [87](#_ENREF_87)] | 0 | 0 | 7 | 7 |
| *Neurosurgery* [[34](#_ENREF_34), [38](#_ENREF_38), [54](#_ENREF_54), [81](#_ENREF_81), [89](#_ENREF_89), [91-93](#_ENREF_91), [96](#_ENREF_96)] | 1 | 2 | 6 | 9 |
| *World Neurosurgery [*[*29*](#_ENREF_29)*]* | 0 | 0 | 1 | 1 |
| *Pediatric Neurosurgery* [[63](#_ENREF_63), [65](#_ENREF_65), [68](#_ENREF_68), [72](#_ENREF_72), [78-80](#_ENREF_78), [97](#_ENREF_97)] | 0 | 1 | 7 | 8 |
| **Totals** | **4** | **9** | **61** | **74** |
